# Supplementary material for: A Genome-Scale RNA–Interference Screen Identifies RRAS Signaling as a Pathologic Feature of Huntington's Disease
Source: PubMed Central journal article supplement (PMC3510027; doi:10.1371/journal.pgen.1003042), 2012-11-29

## Supplemental Figure 6

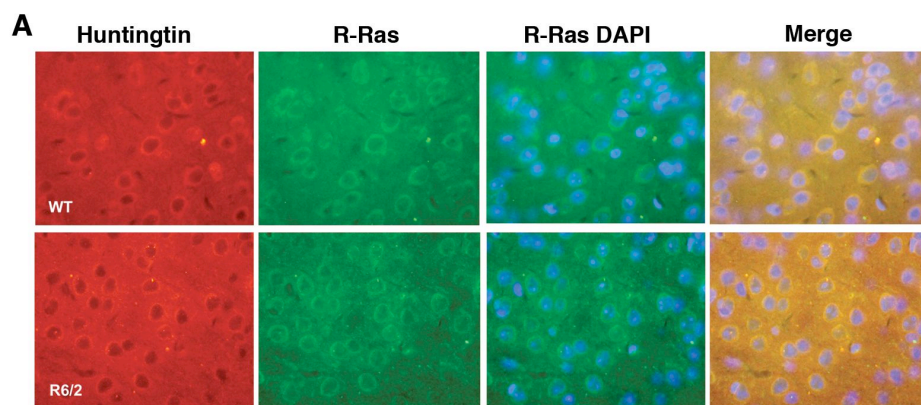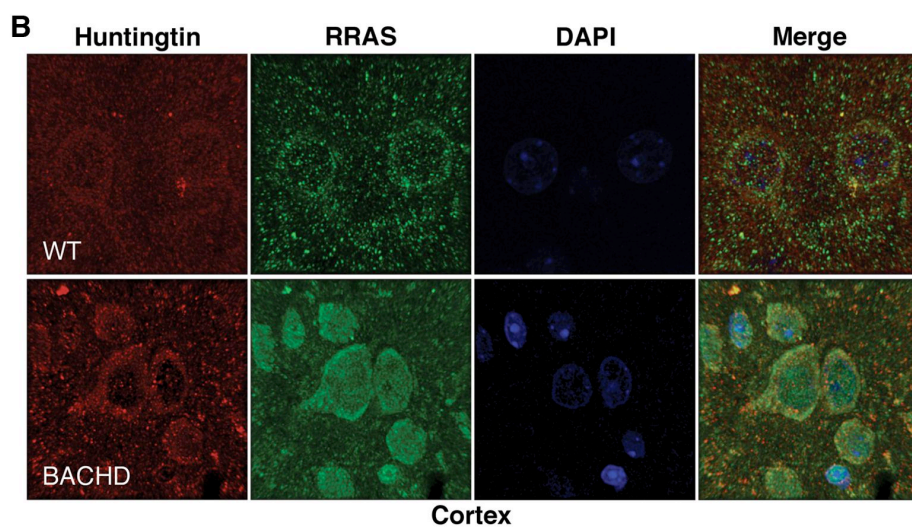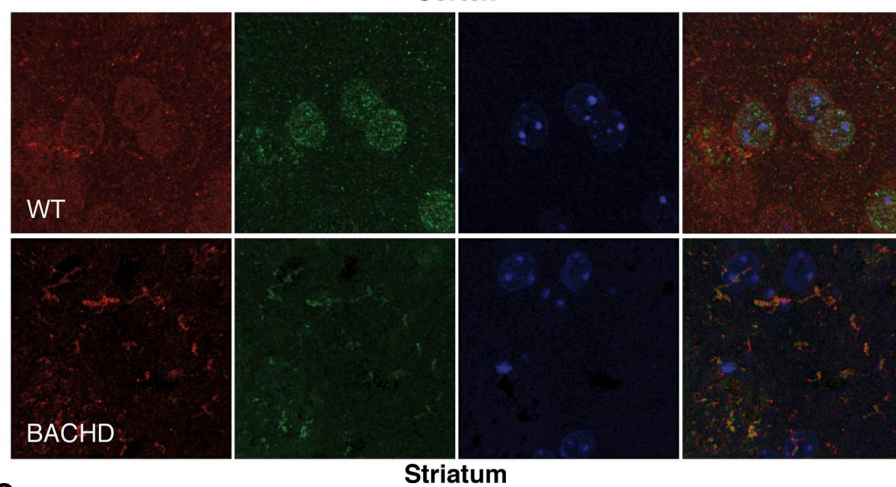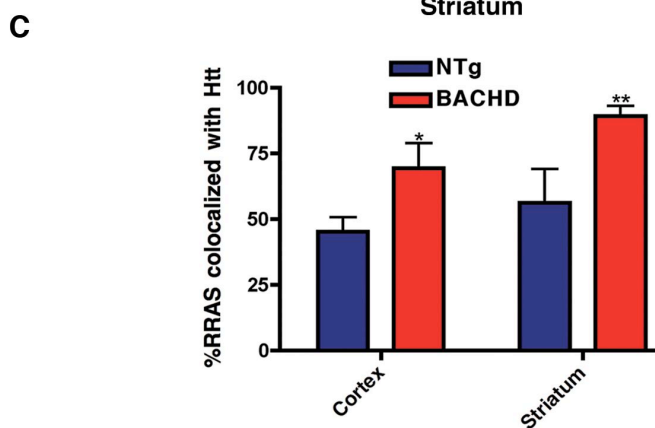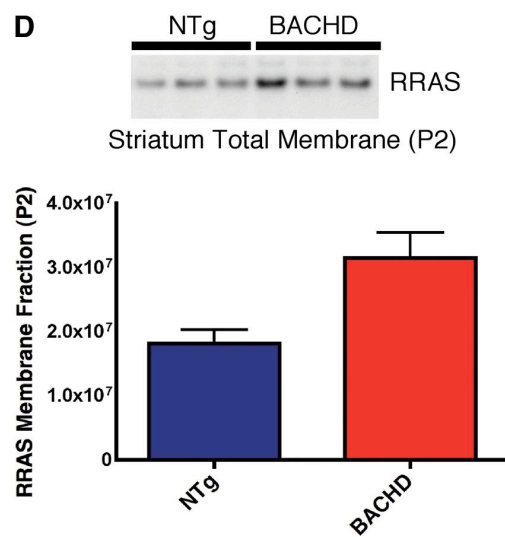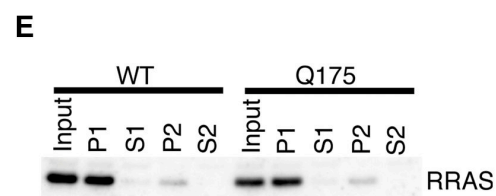

Supplement: pgen.1003042.s006.pdf [file pgen.1003042.s006.pdf]
